# Supplementary material for: Respiratory immune status and microbiome in recovered COVID-19 patients revealed by metatranscriptomic analyses
Source: PubMed Central journal article supplement (PMC9724627; doi:10.3389/fcimb.2022.1011672), 2022-11-22

A

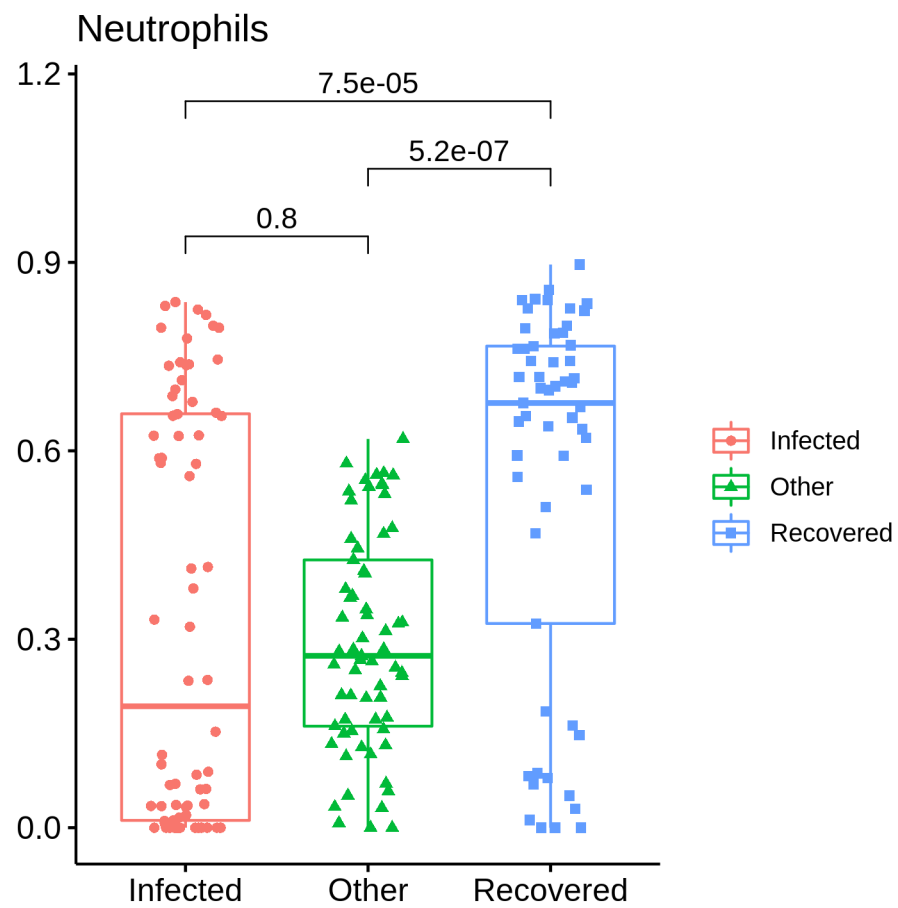

B

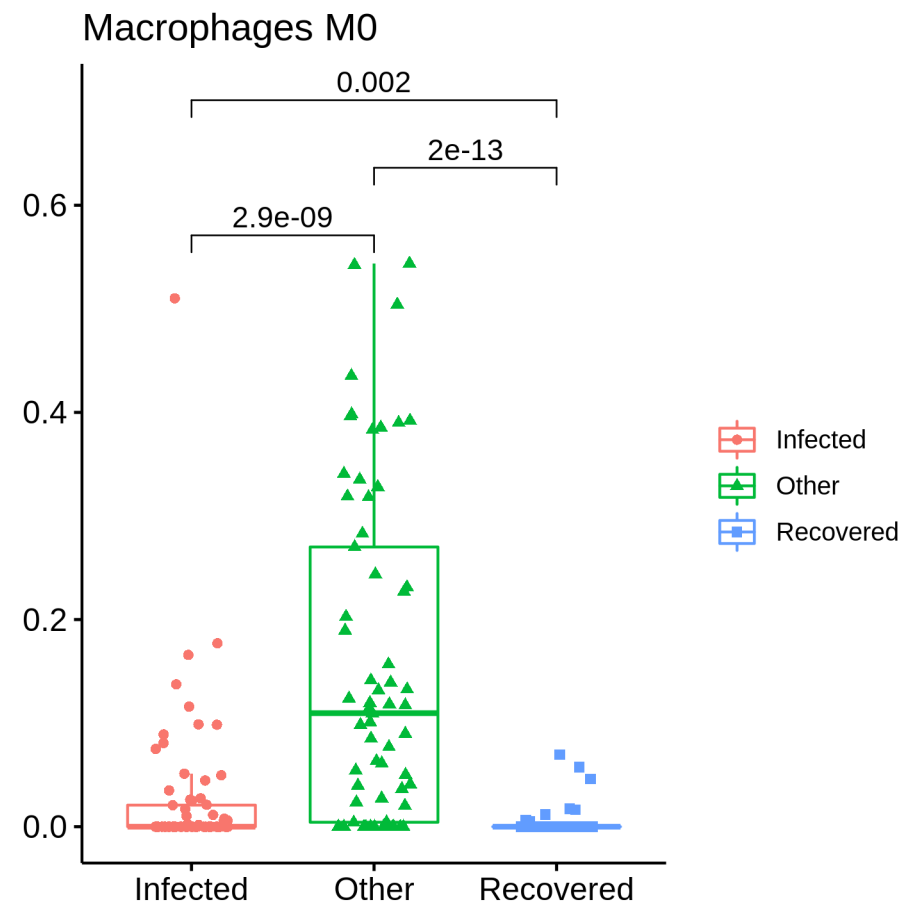

C

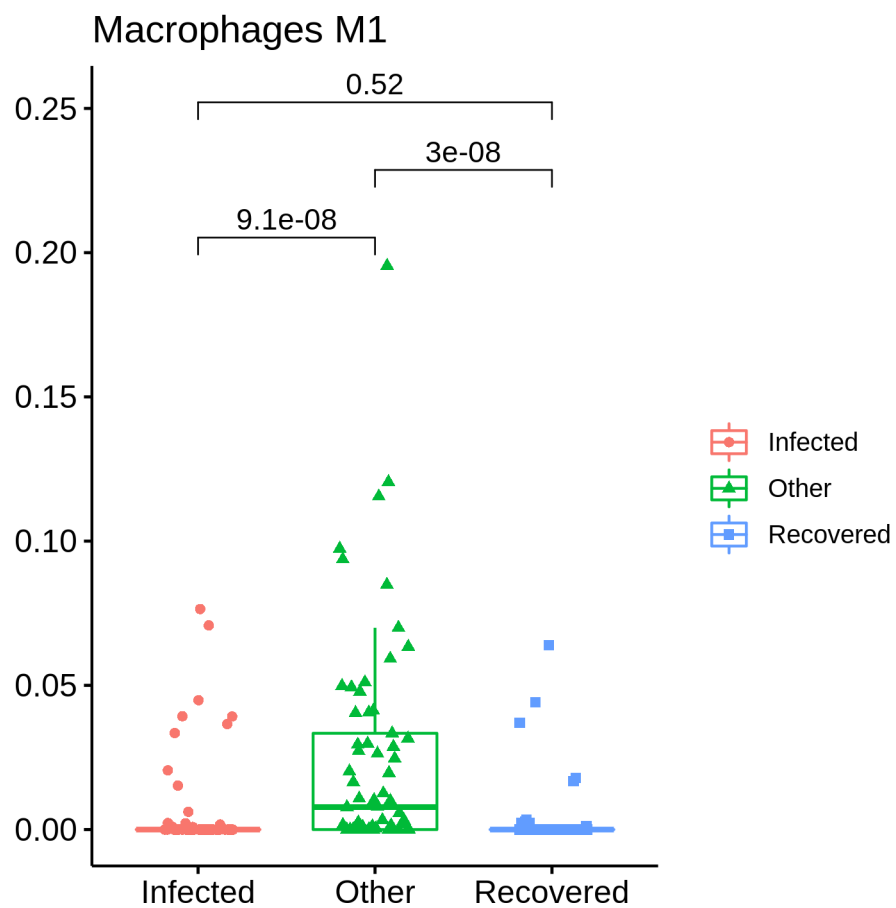

D

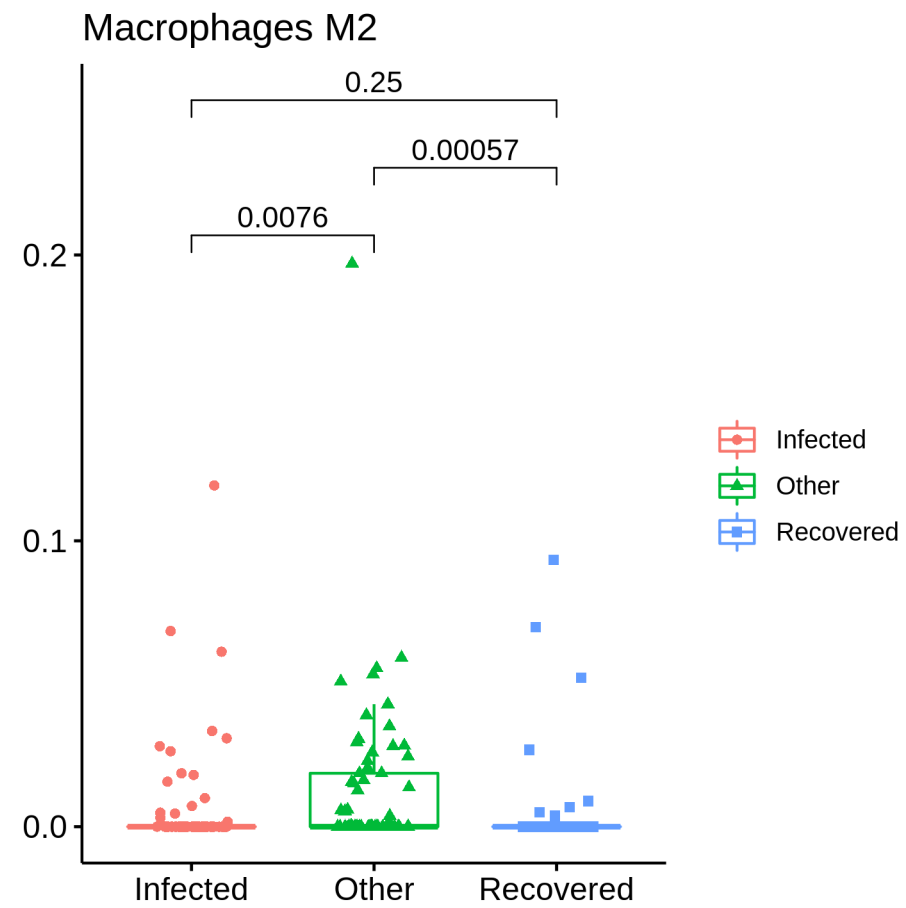

Supplement: DataSheet_1.pdf [file DataSheet_1.pdf]
