# Supplementary material for: Respiratory immune status and microbiome in recovered COVID-19 patients revealed by metatranscriptomic analyses
Source: PubMed Central journal article supplement (PMC9724627; doi:10.3389/fcimb.2022.1011672), 2022-11-22

**A**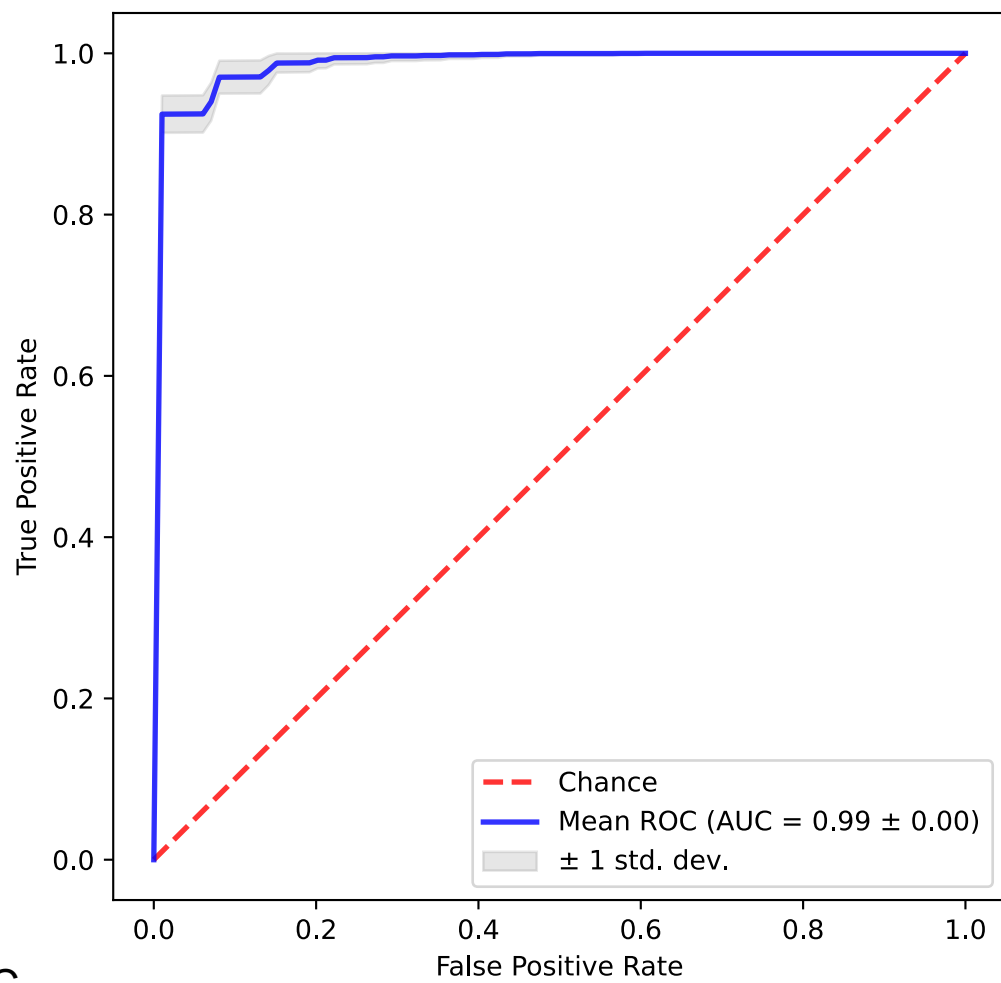**B**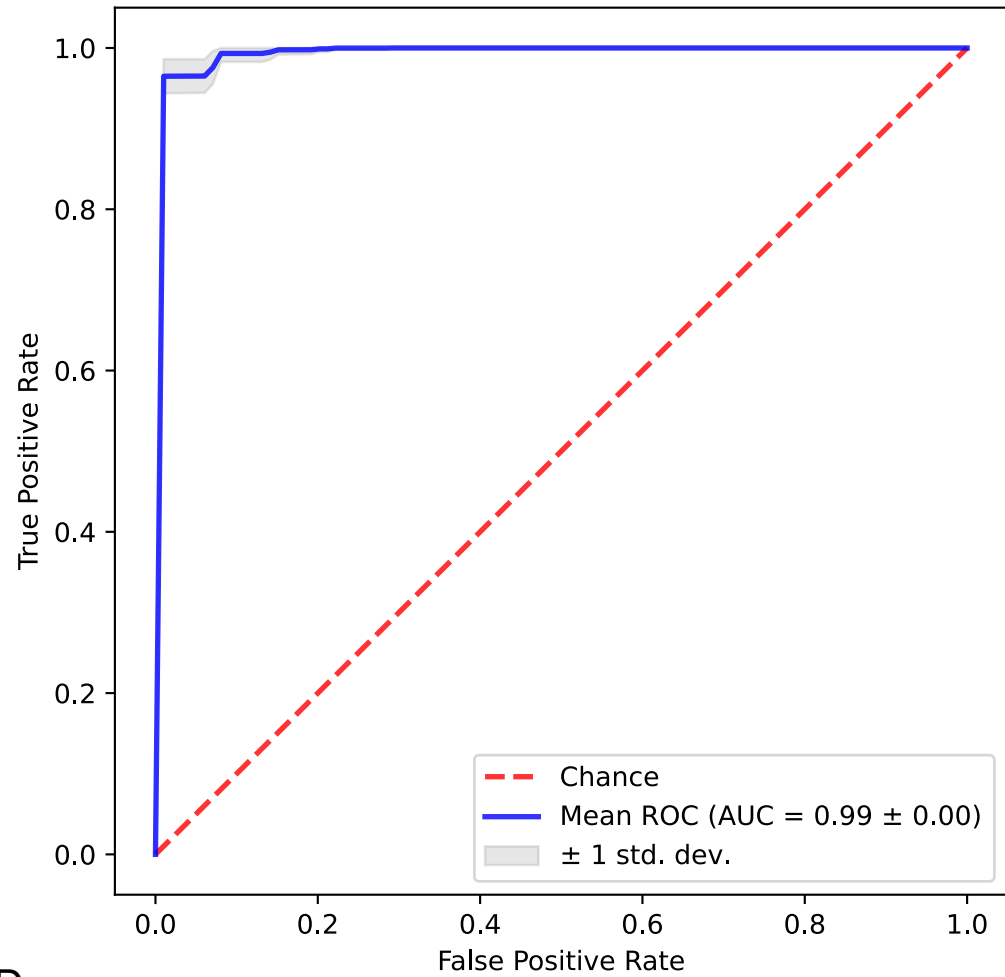**C**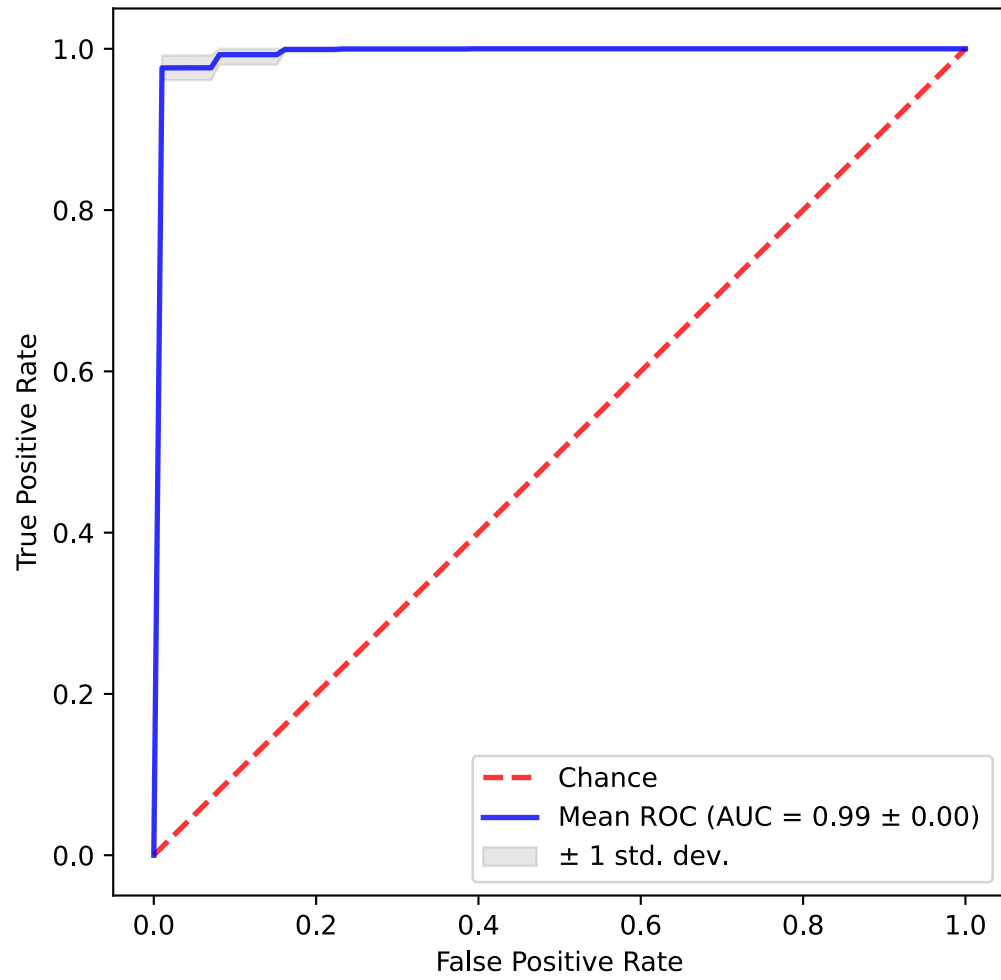**D**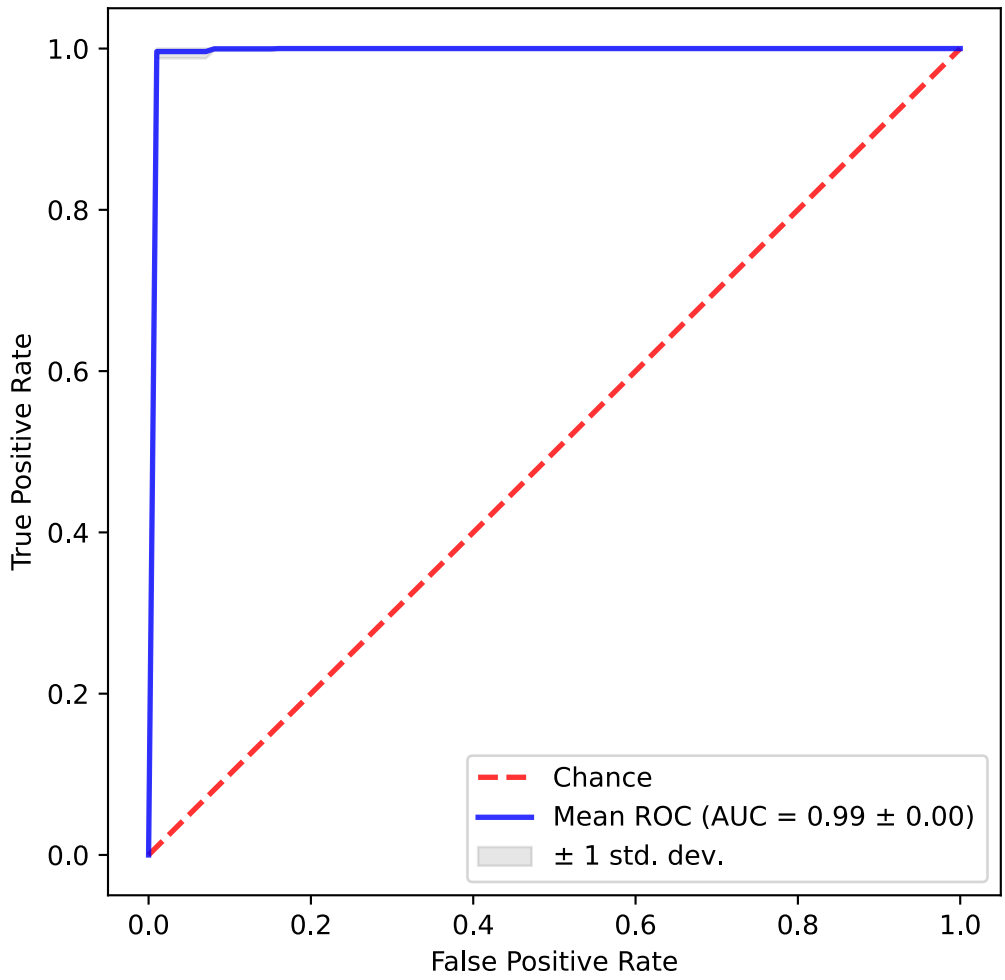

Supplement: DataSheet_2.pdf [file DataSheet_2.pdf]
